# Supplementary material
Source: publisher figshare collection journal article supplement (https://sage.figshare.com/ndownloader/files/22078035)

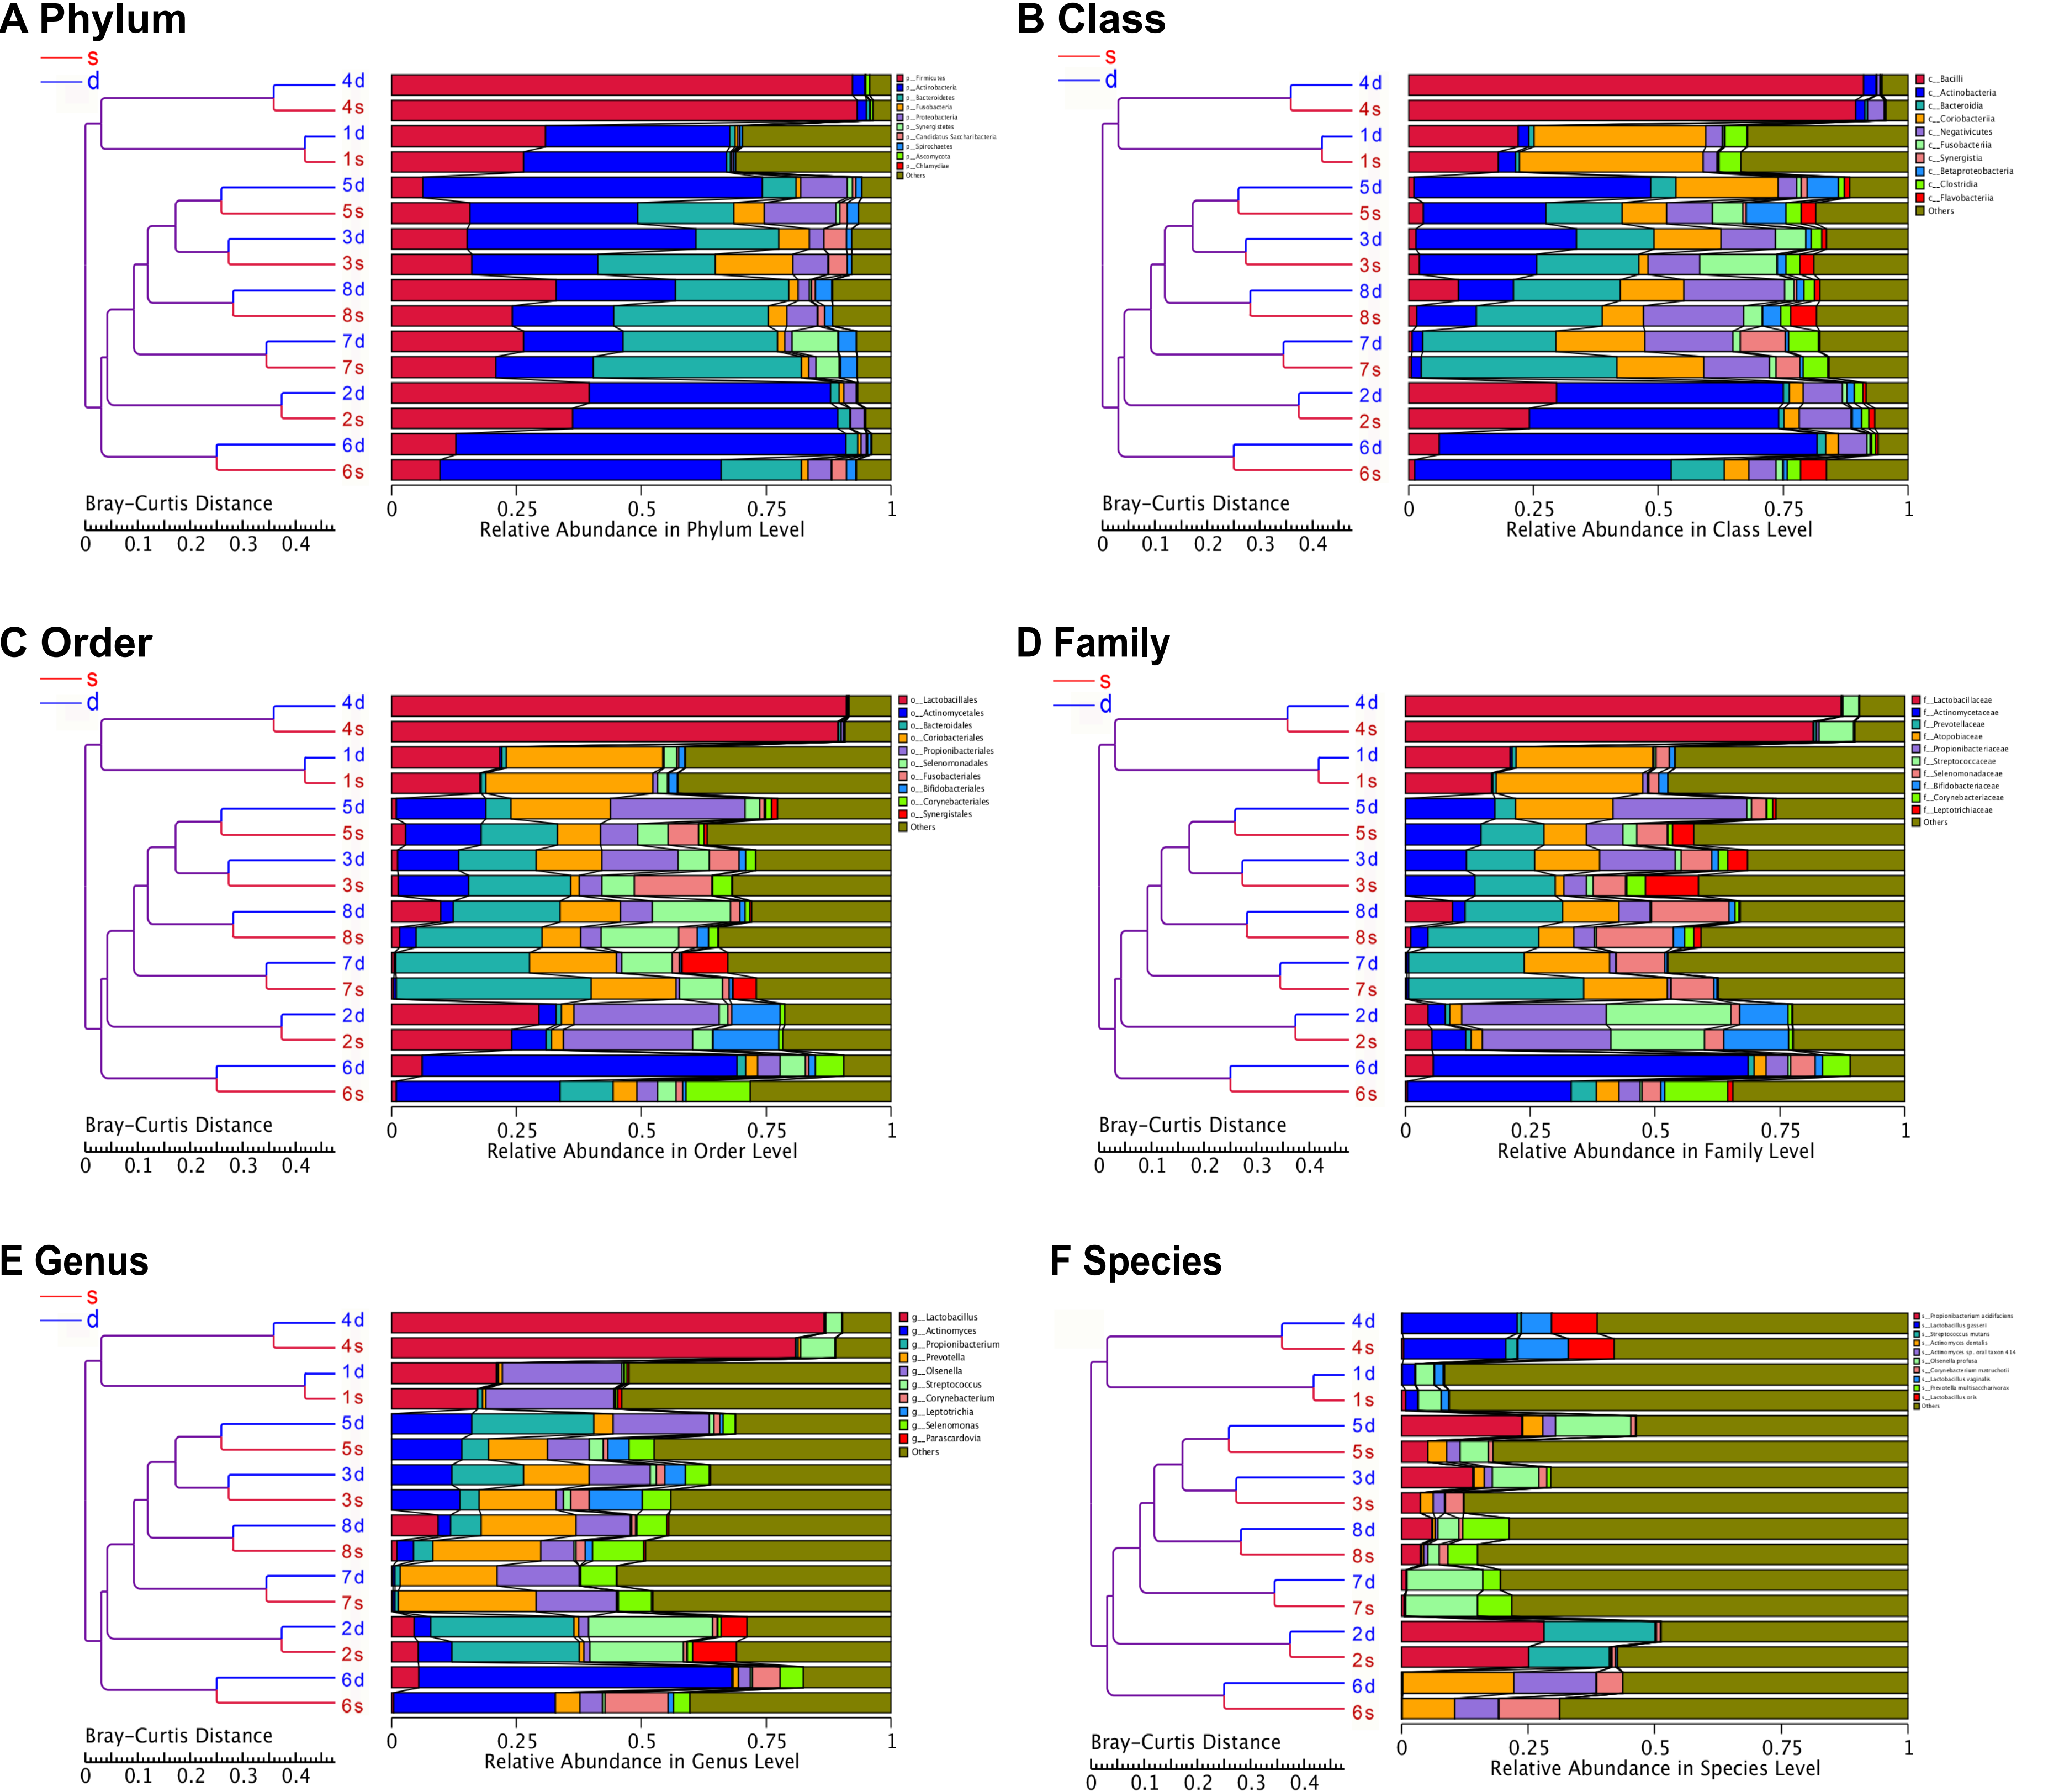

Appendix Figure 5 Cluster Analysis of top 10 microbial taxa.

Supplement: Supplementary file 1 [file 22078035]
